# Supplementary material for: Specification of implementation interventions to address the cascade of HIV care and treatment in resource-limited settings: a systematic review
Source: Springer Nature journal article supplement (doi:10.1186/s13012-017-0630-8), 2017-08-08
Supplement: MOESM2 [file 13445920]

First author  Year  Journal

Title

Citation

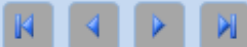

**NEW STUDY**

**Study excluded** PMTCT  Does not meet criteria  Reason

**Delete Study**

Characteristics **Proctor**

Study data abstraction complete?

Publication type

Study design

Design other

Country

Region

Setting

The context where the action is carried out.

Clinic or Community?

Urban or Rural?

Inclusion/exclusion criteria

Intervention

Comparator

Comments

Sample size

Did the study have a positive effect?  Yes  No

**Key Populations Addressed**

|                 | Yes                   | No                    |
|-----------------|-----------------------|-----------------------|
| MSM             | <input type="radio"/> | <input type="radio"/> |
| PWID            | <input type="radio"/> | <input type="radio"/> |
| Pregnant women  | <input type="radio"/> | <input type="radio"/> |
| TB              | <input type="radio"/> | <input type="radio"/> |
| Infants         | <input type="radio"/> | <input type="radio"/> |
| Children        | <input type="radio"/> | <input type="radio"/> |
| Orphans         | <input type="radio"/> | <input type="radio"/> |
| Street children | <input type="radio"/> | <input type="radio"/> |
| Adolescents     | <input type="radio"/> | <input type="radio"/> |
| CSW             | <input type="radio"/> | <input type="radio"/> |
| Disabled        | <input type="radio"/> | <input type="radio"/> |
| Prisoners       | <input type="radio"/> | <input type="radio"/> |
| Migrants        | <input type="radio"/> | <input type="radio"/> |

Key pop comments

First author  Year  Journal   
 Title   
 Citation

Study excluded
  PMTCT
  Does not meet criteria
  Reason

Characteristics **Proctor**

Reviewer  Proctor review complete?

**Cascade step(s) targeted**

|                   | Yes                   | No                    |
|-------------------|-----------------------|-----------------------|
| Testing           | <input type="radio"/> | <input type="radio"/> |
| Linkage           | <input type="radio"/> | <input type="radio"/> |
| Staging           | <input type="radio"/> | <input type="radio"/> |
| Pre-ART retention | <input type="radio"/> | <input type="radio"/> |
| Initiation        | <input type="radio"/> | <input type="radio"/> |
| ART retention     | <input type="radio"/> | <input type="radio"/> |
| Adherence         | <input type="radio"/> | <input type="radio"/> |

Comments:

**Behavioral target**

Note: behavioral target may or may not be the same as the cascade step. Mediator is any behavioral target purported to mediate intervention effect on cascade outcome.

Behavioral target specified  Yes  No

Target is separate from cascade  Yes  No

Level of behavioral target

Describe behavioral target:

**Implementation intervention target**

Implementation target specified  Yes  No

COM components present:

Capability  Yes  No

Opportunity  Yes  No

Motivation  Yes  No

Comment

### Actor-Action

Action specified  Yes  No

Action description:

Actor specified  Yes  No

Dose specified  Yes  No

Temporality specified  Yes  No

### Intervention classification

Intervention 'named'  Yes  No

Intervention Type

### Implementation measures

Any implementation measure  Yes  No

Feasibility  Yes  No

Acceptability  Yes  No

Adoption  Yes  No

Fidelity  Yes  No

Cost  Yes  No

Sustainability  Yes  No

Comment

### Implementation outcomes

Any COM implementation outcome  Yes  No

Capability  Yes  No

Opportunity  Yes  No

Motivation  Yes  No

Behavioral outcome  Yes  No

Relevant only if behavioral target  
is separate from cascade

Comment
